# Supplementary material for: Efficient fabrication of MoS2 nanocomposites by water-assisted exfoliation for nonvolatile memories
Source: Royal Society of Chemistry journal article supplement (doi:10.1039/d1gc00162k), 2021-01-01
Supplement: d1gc00162k1.pdf [file d1gc00162k1.pdf]

## Supporting Information

### **Efficient Fabrication of MoS<sub>2</sub> Nanocomposites by Water-Assisted Exfoliation for Nonvolatile Memories**

*Honglei Wang,<sup>a</sup> Pengfei Cheng,<sup>a</sup> Jun Shi,<sup>b</sup> Dong Wang,<sup>a,\*</sup> Hongguang Wang,<sup>c,\*</sup> Jörg Pezoldt,<sup>a</sup> Michael Stich,<sup>d</sup> Runfeng Chen,<sup>b,\*</sup> Peter A. van Aken,<sup>c</sup> Wei Huang,<sup>b,e</sup> Peter Schaaf<sup>a</sup>*

<sup>a</sup> Chair Materials for Electrical Engineering and Electronics, Institute of Materials Science and Engineering and Institute of Micro and Nanotechnologies MacroNano®, TU Ilmenau, Gustav-Kirchhoff-Str. 5, 98693 Ilmenau, Germany, E-mail: dong.wang@tu-ilmenau.de.

<sup>b</sup> Key Laboratory for Organic Electronics and Information Displays & Jiangsu Key Laboratory for Biosensors, Institute of Advanced Materials (IAM), Jiangsu National Synergetic Innovation Center for Advanced Materials (SICAM), Nanjing University of Posts and Telecommunications (NUPT), Nanjing 210023, China, E-mail: iamrfchen@njupt.edu.cn.

<sup>c</sup> Max Planck Institute for Solid State Research, Heisenbergstr. 1, 70569 Stuttgart, Germany, Email: hgwang@fkf.mpg.de.

<sup>d</sup> Electrochemistry and Electroplating Group, Institute of Materials Science and Engineering, TU Ilmenau, Gustav-Kirchhoff-Straße 6, 98693 Ilmenau, Germany.

<sup>e</sup> Shaanxi Institute of Flexible Electronics (SIFE), Northwestern Polytechnical University (NPU), Xi'an 710072, China.

## 1 Experimental

**Chemicals.** Molybdenum sulfide ( $\text{MoS}_2$ ) powders (with flake sizes of about 2  $\mu\text{m}$ , purity of 99%), N-methyl-2-pyrrolidone (NMP) (99%), isopropanol (IPA) (99%), and dimethyl sulfoxide (DMSO) (99%) were purchased from Sigma-Aldrich. Carboxylated chitosan (CC) (with sizes of about 300  $\mu\text{m}$ , purity of 99%) and methanol (MeOH) were purchased from Energy Chemical. Other chemicals are of analytical grade and used without further purification.

**Estimation of the amount of  $\text{MoS}_2$  dispersion.** The dispersions of CM0, CM0.05, CM0.1, CM0.2, CM0.5, CM1.0, and CM2.0 have a weight ratio of CC:  $\text{MoS}_2$  of 0:20, 1:20, 1:10, 1:5, 1:2, 1:1, and 2:1, respectively. In order to calculate the concentration of  $\text{MoS}_2$  nanosheets in the dispersion, after centrifugation at 1500 rpm, a known volume (10 ml) of CM1.0 dispersion in DI water was carefully filtered under high vacuum using a hydrophilic poly(vinylidene fluoride) (PVDF) membrane (pore diameter = 0.22  $\mu\text{m}$ ) of known mass (126.2 mg). The collected residue was thoroughly washed with DI water to remove excess of not adsorbed CC. Finally, the film containing the residue was dried in a vacuum oven at room temperature overnight until constant weight to ensure complete removal of the solvent. The mass of the membrane containing the residue material was found to be 150.3 mg, from which the final concentration of  $\text{MoS}_2$  nanosheet was calculated to be 2.41 mg/ml. The final concentrations of dispersed CM0.2 were also obtained in similar conditions. Errors ranged from 5 to 15% in triplicates in all cases.

## 2 Table Part

**Table S1.** Summary of reported traditional liquid phase exfoliation methods in comparison to this work.

| <b>Materials</b>         | <b>Grinding solvent <sup>a</sup></b> | <b>Sonicating solvent <sup>a,b</sup></b> | <b>Sonication time</b> | <b>Layers of nanosheets</b> | <b>Reference</b> |
|--------------------------|--------------------------------------|------------------------------------------|------------------------|-----------------------------|------------------|
| MoS <sub>2</sub>         | -                                    | formamide                                | 12 h                   | 5 layers                    | 1                |
| MoS <sub>2</sub>         | -                                    | DI water                                 | 8 h                    | 9-10 layers                 | 2                |
| MoS <sub>2</sub>         | -                                    | DMF                                      | 10 h                   | 1-5 layers                  | 3                |
| Sericin/MoS <sub>2</sub> | -                                    | DI water                                 | 24 h                   | 1-12 layers                 | 4                |
| Silk/MoS <sub>2</sub>    | -                                    | NMP                                      | 10 h                   | 4-8 layers                  | 5                |
| MoS <sub>2</sub>         | NMP                                  | Ethanol/water                            | 2 h                    | 2-14 layers                 | 6                |
| CC/2H-MoS <sub>2</sub>   | DI water                             | DI water                                 | 5 h                    | 1-5 layers                  | This Work        |

<sup>a</sup> NMP is N-methyl-2-pyrrolidone.

<sup>b</sup> DMF is N,N-dimethyl formaldehyde.

**Table S2.** Summary of reported nonvolatile WORM memory device performance in comparison to this work.

| Active layer <sup>a</sup> | ON/OFF ratio      | Retention time      | Reference |
|---------------------------|-------------------|---------------------|-----------|
| PEF                       | 10 <sup>4</sup>   | 10 <sup>4</sup> s   | 7         |
| PCoumSi                   | 10 <sup>3</sup>   | 4×10 <sup>3</sup> s | 8         |
| AlO <sub>x</sub> -native  | 10 <sup>4</sup>   | 10 <sup>3</sup> s   | 9         |
| MoS <sub>2</sub> -PCBM    | 10 <sup>2</sup>   | /                   | 10        |
| CC/2H-MoS <sub>2</sub>    | 3×10 <sup>3</sup> | 10 <sup>4</sup> s   | This Work |

<sup>a</sup> PEF is polyethylene furanoate, PCoumSi is polycoumarinsiloxanes, PCBM is [6,6]-phenyl-C61-butyric acid methyl ester.

**Table S3** Assignment of the peak positions in Fig. S5

| Peak position,<br>cm <sup>-1</sup> | Assignment                                                                                         | Literature Source |
|------------------------------------|----------------------------------------------------------------------------------------------------|-------------------|
| 3412                               | Carboxylated Chitosan: overlap –O-H on – N-H (stretching vibration)                                | 12, 15            |
| 3280                               | Carboxylated Chitosan: overlap –O-H on – N-H                                                       | 11, 12            |
| 3088                               | Carboxylated Chitosan: Symmetric N-H stretch                                                       | 12                |
| 2957                               | Carboxylated Citosan: -CH <sub>3</sub> asymmetric stretching vibration                             | 12                |
| 2924                               | Carboxylated: -CH <sub>2</sub> symmetric stretching                                                | 12                |
| 2873                               | Carboxylated: -CH <sub>3</sub> stretching                                                          | 12                |
| 1650                               | Carboxylated Chitosan: -C=N overlap – C=O in NH=C=O                                                | 15, 16            |
| 1570                               | Carboxylated Chitosan: overlap -C=O on – N-H                                                       | 11, 12            |
| 1414                               | Carboxylated Chitosan: CH <sub>2</sub> bending                                                     | 12                |
| 1303                               | Carboxylated Chitosan: -N-H stretching                                                             | 12                |
| 1145                               | Carboxylated Chitosan: C-O-C bending mode                                                          | 12                |
| 1073                               | Carboxylated Chitosan: C-O stretch                                                                 | 12                |
| 1033                               | Carboxylated Chitosan: C-O stretching mode of polysaccharide backbone                              | 12                |
| 888                                | Carboxylated Chitosan: -C-H from polysaccharide's structure overlapped by S-OH of MoS <sub>2</sub> | 11, 14            |
| 607                                | Silicon: Overlap of Si-C an Si(LO+TA)                                                              | 13                |
| 383                                | 2H-MoS <sub>2</sub>                                                                                | 14, 17            |

### 3 Figure Part

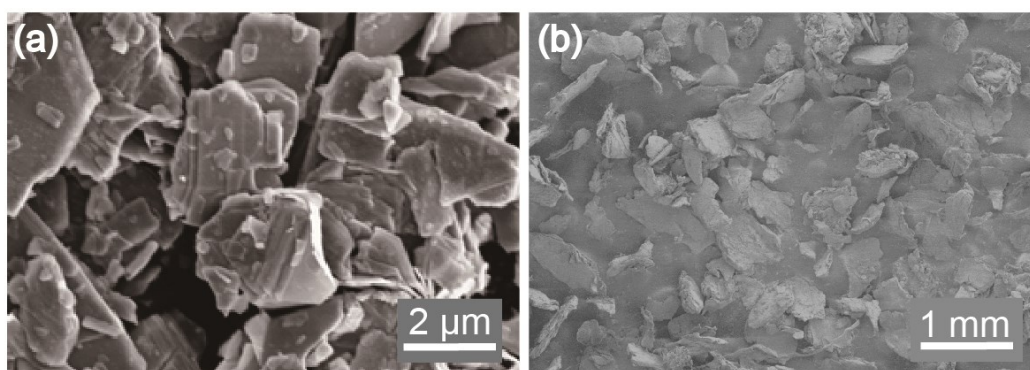

Fig. S1 SEM image of bulk MoS<sub>2</sub> powder (a) and CC powder (b).

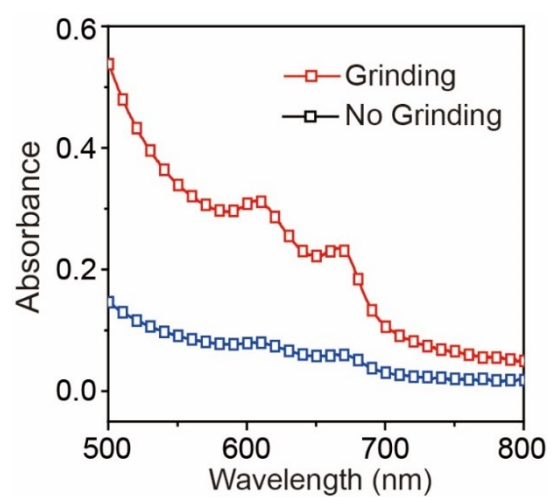

Fig. S2. UV-vis absorption spectra of the ground and unground CC/2H-MoS<sub>2</sub> nanocomposites.

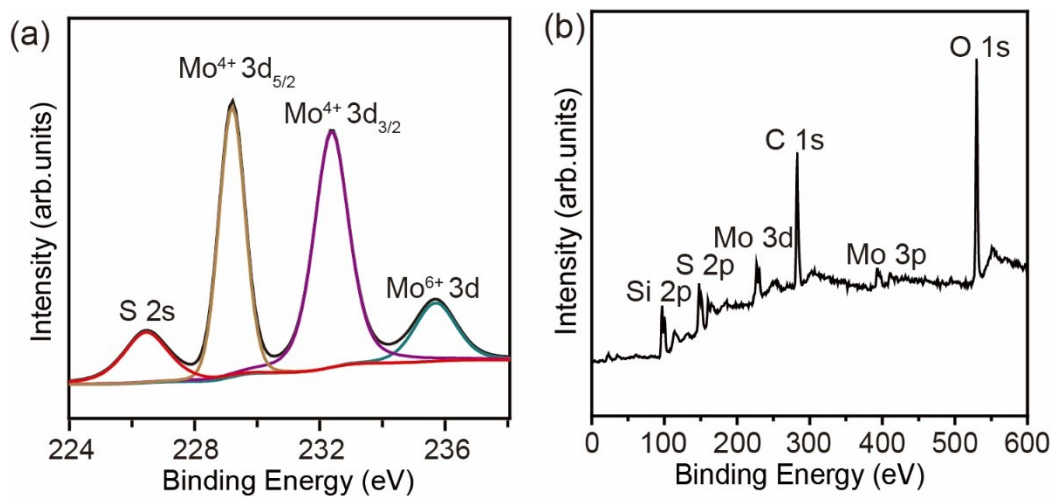

Fig. S3. S-2s and Mo-3d XPS spectrum (a) and XPS survey spectrum (b) of CM0.2 deposited on Si wafer.

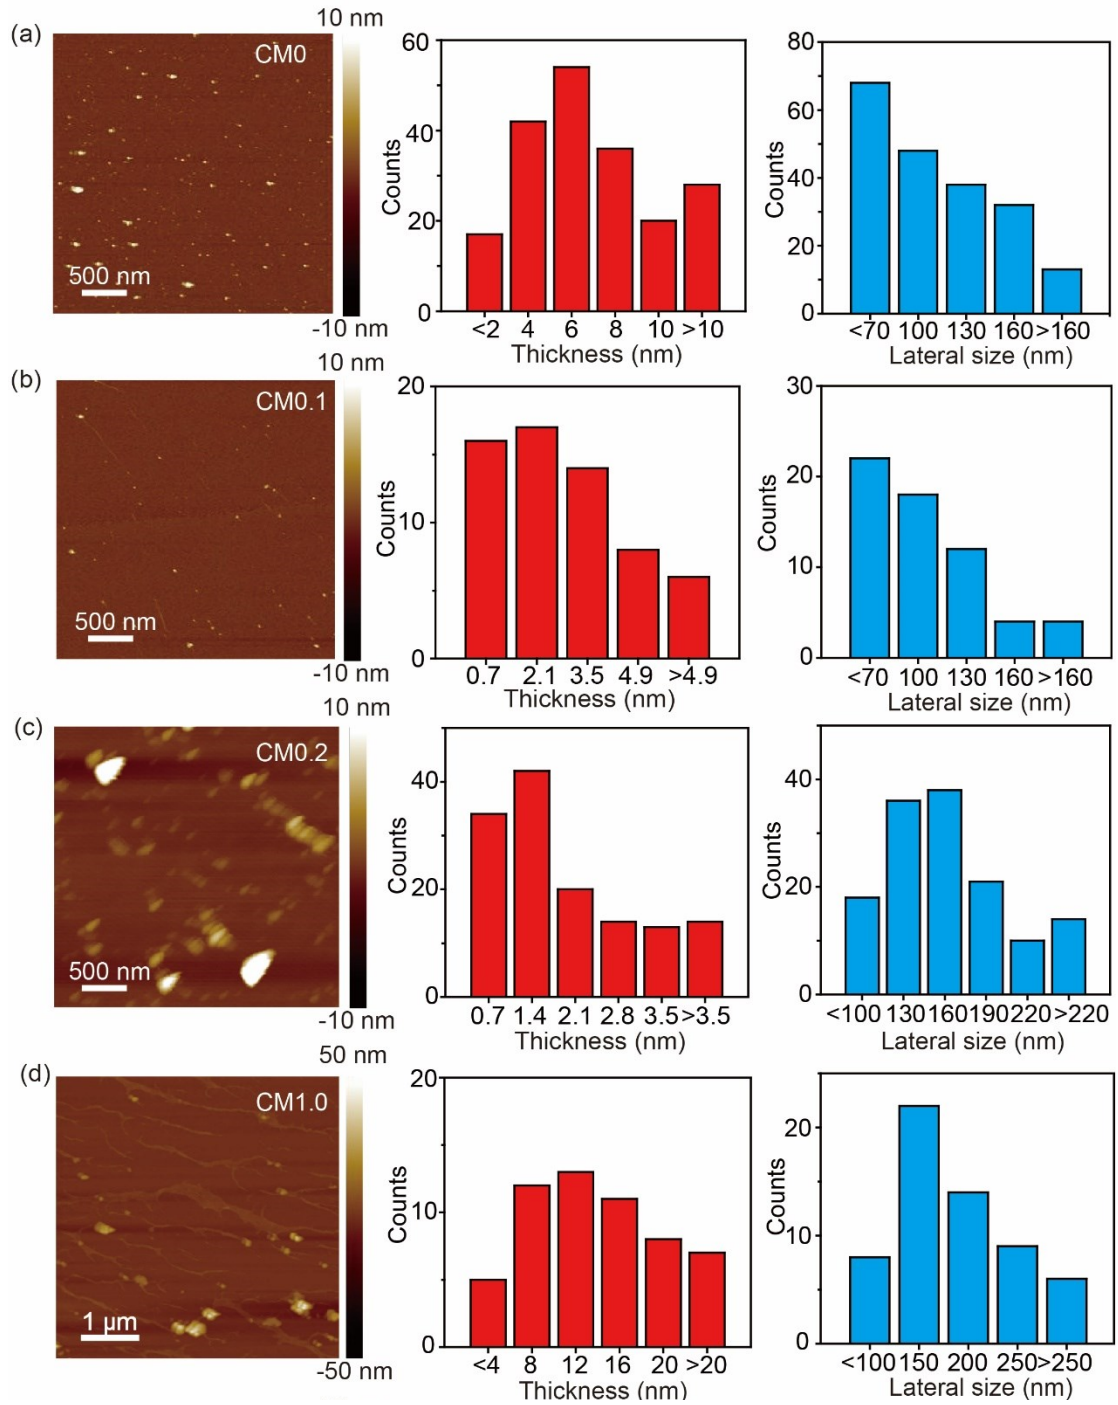

Fig. S4. AFM images of CM0 (a), CM0.1 (b), CM0.2 (c), and CM1.0 (b) with the corresponding thickness and lateral size distributions of the nanosheets.

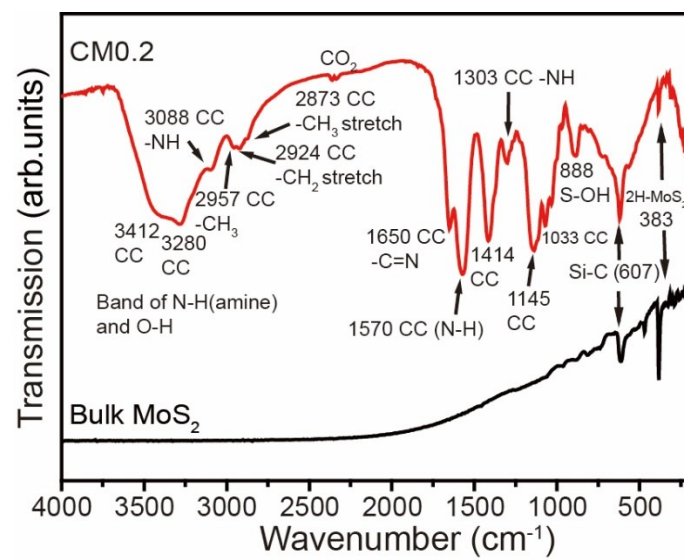

Fig. S5. FTIR spectra of CM0.2 and bulk MoS<sub>2</sub>.

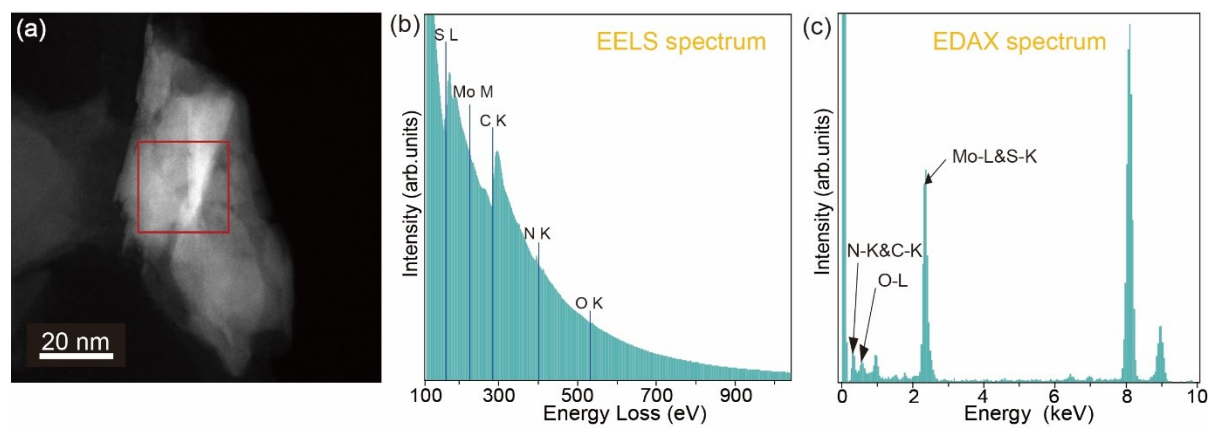

Fig. S6. (a) HAADF-STEM image of CM0.2 and the corresponding (b) EELS spectrum and (c) EDX spectrum.

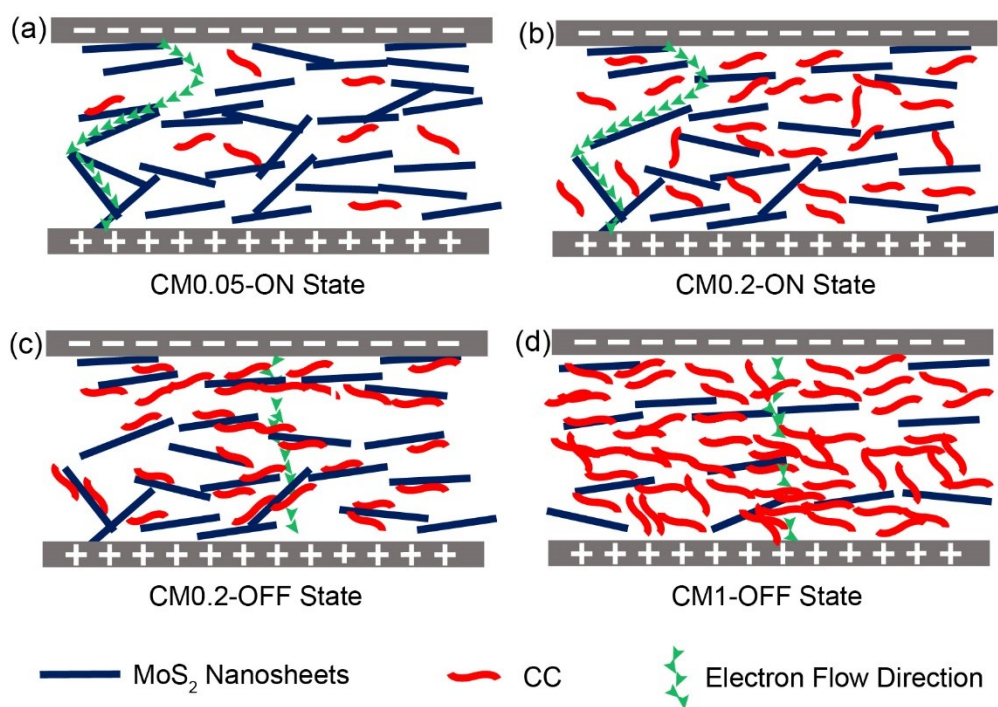

Fig. S7. The memory behavior and mechanisms in CM<sub>x</sub>-based ( $x=0.05$ ,  $0.2$  and  $1.0$ ) memory devices.

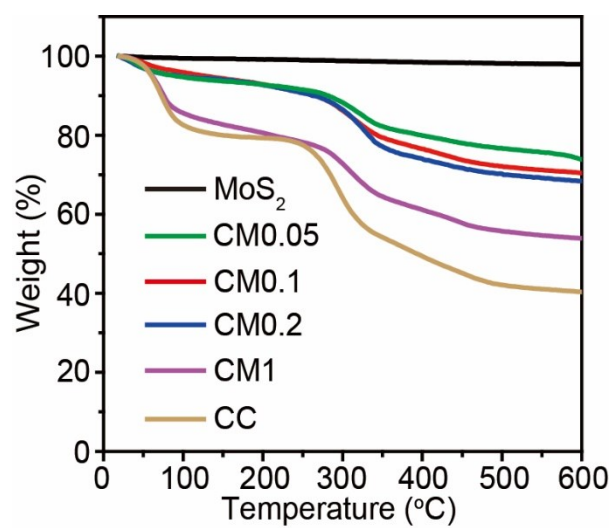

Fig. S8. TGA curves of the bulk MoS<sub>2</sub>, CM0.05, CM0.1, CM0.2, CM1 and CC.

## REFERENCES

- 1 X. Gan, H. Zhao, D. Lei and P. Wang, *J. Catal.*, 2020, **391**, 424-434.
- 2 H. Ma, S. Ben, Z. Shen, X. Zhang, C. Wu, S. Liao and F. An, *Appl. Surf. Sci.*, 2020, **512**, 145588.
- 3 Y. Wang, K. Wang, C. Zhang, J. Zhu, J. Xu and T. Liu, *Small*, 2019, **15**, 1903816.
- 4 D. Kathiravan, B.-R. Huang, A. Saravanan, A. Prasannan and P.-D. Hong, *Sensor. Actuat. B-Chem.*, 2019, **279**, 138-147.
- 5 H. Sim, J. Lee, B. Park, S. J. Kim, S. Kang, W. Ryu and S. C. Jun, *Nano Res.*, 2016, **9**, 1709-1722.
- 6 Y. Yao, L. Tolentino, Z. Yang, X. Song, W. Zhang, Y. Chen and C.-P. Wong, *Adv. Funct. Mater.*, 2013, **23**, 3577-3583.
- 7 J. Y. Lam, G. W. Jang, C. J. Huang, S. H. Tung and W. C. Chen, *ACS Sustain. Chem. Eng.*, 2020, **8**, 5100-5106.
- 8 Z. Chen, Y. Liu, H. Li, X. Sun, S. Yan and Z. Ren, *J. Mater. Chem. C*, 2020, **8**, 7527-7533.
- 9 J. A. Avila-Nino, M. Reyes-Reyes, O. Nunez-Olvera and R. Lopez-Sandoval, *Appl. Surf. Sci.*, 2018, **454**, 256-261.
- 10 W. Lv, H. Wang, L. Jia, X. Tang, C. Lin, L. Yuwen, L. Wang, W. Huang and R. Chen, *ACS Appl. Mater. Inter.*, 2018, **10**, 6552-6559.
- 11 P. Negra, A. Caunii, I. Sarac, M. Butnarui, *Dig. J. Nanomater. Biostructures*, 2015, **10**, 1129-1138.
- 12 T. Jin, D.K. Kurdyla, S. Hrapovic, A.C.W. Leung, S. Ragnier, Y. Liu, A. Moores, E. Lam, *Biomacromolecules*, 2021, **21**, 2236-2245.

- 13 W.S. Lau, World Scientific, Singapore, 1999.
- 14 Y. Li, X. Wang, M. Liu, H. Luo, L. Deng, L. Huang, S. Wie, C. Zhou, Y. Xu, *Nanomaterials*, 2019, **9**, 906.
- 15 H. Yang, Y. Liu, L. Kong, L. Kang, F. Ran, *J. Power Sources*, 2019, **426**, 47-54.
- 16 E. Mohammadi, H. Daraei, R. Ghanbari, S. D. Athar, Y. Zandsalimi, A. Ziaee, A. Maleki, K. Yetilmezsoy, *J. Mol. Liq.*, 2018, **273**, 116-124.
- 17 T.N.Y. Khawula, K. Raju, P.J. Franklyn, I. Sigalas, K.I. Ozomena, *J. Mater. Chem. A*, 2016, **4**, 6411-6425,
